1 **Prevalence and determinants of not testing for HIV**  
2 **among young adult women in Papua New Guinea:**  
3 **findings from the 2016–2018 Demographic and Health**  
4 **Survey**

5 McKenzie K. Maviso<sup>1</sup>, Fatch Welcome Kalembo<sup>2</sup>

6

7 <sup>1</sup>School of Medicine and Health Sciences, University of Papua New Guinea, Port Moresby, Papua New  
8 Guinea

9 <sup>2</sup>School of Nursing, Curtin University, Perth, Western Australia, Australia

10

11 Correspondence to McKenzie K. Maviso; [mckenzie.maviso@upng.ac.pg](mailto:mckenzie.maviso@upng.ac.pg)

12

13

14

15

16

17

18

19

20

21

22

23

24

25

## 26 **Abstract**

### 27 **Objective**

28 The study investigated the factors associated with not ever testing for HIV among women aged 15–29  
29 years in Papua New Guinea (PNG).

### 30 **Design and setting**

31 The study used secondary data from the 2016–2018 Demographic and Health Survey (DHS) of PNG, a  
32 nationally representative cross-sectional survey that used a two-stage stratified sampling.

### 33 **Participants**

34 A total weighed sample of 5,164 young adult women aged 15–29 years were included in the study.

### 35 **Primary outcome measure**

36 Ever been tested for HIV was the primary outcome of the study. All analyses were adjusted using  
37 survey weights to account for unequal sampling probabilities.

### 38 **Results**

39 The prevalence of not testing for HIV was 58.8% (95% CI: 57.4%, 60.1%). The mean age was 21.65  
40 (SD  $\pm$  4.23) years. The majority (62.9%) of young adult women in rural areas were not tested for HIV.  
41 In the multivariable analysis, those who were never married (AOR: 4.9, 95% CI: 3.6–6.6), had poor  
42 wealth index (AOR: 1.8, 95% CI: 1.3–2.5), from rural areas (AOR: 2.0, 95% CI: 1.5–2.6), from the  
43 Momase region (AOR: 1.3, 95% CI: 1.0–1.7, did not read newspaper or magazine (AOR: 1.7, 95% CI:  
44 1.3–2.1), did not listen to radio (AOR: 1.5, 95% CI: 1.1–2.0), experienced early sexual debut (AOR:  
45 1.5, 95% CI: 1.1–1.9), had one sexual partner (AOR: 1.5, 95% CI: 1.2–2.0), and reported no STI in the  
46 past 12 months (AOR: 1.8, 95% CI: 1.1–3.1) had higher odds of not testing for HIV.

### 47 **Conclusions**

48 Our study found a very high unmet need for HIV testing among young adult women in PNG. Health  
49 promotion programmes should be designed to increase HIV knowledge and access to HIV testing  
50 services. Furthermore, efforts to optimise HIV testing services should target women who are  
51 disadvantaged and from rural areas.

## 52 **Strengths and limitations of this study**

- 53   ▪ This study used a nationally representative large sample of young adult women aged 15–29 years  
54       from the 2016–2018 PNGDHS; thus, the findings are generalisable to the entire population of this  
55       age group.
- 56   ▪ The study provides much-needed data for strategic planning and programming to improve the  
57       health outcomes of young adult women in the country.
- 58   ▪ This is a cross-sectional study, and as such, it is not possible to make causal inferences.
- 59   ▪ The level of knowledge or awareness of where to get tested for HIV was not included in the  
60       analysis, and it remains unknown whether this variable contributes to the high proportion of  
61       respondents who remain unaware of their HIV status.
- 62   ▪ Responses to the questions from respondents were self-reported, and this could have resulted in  
63       behavioural desirability bias.

64

## 65 **Introduction**

66 Globally, an estimated 39 million people were living with HIV in 2022, and approximately 17% (6.5  
67 million) of these were from the Asia-Pacific region. [1] Among people living with HIV, young women  
68 continue to endure a disproportionate burden of the virus. [2] Young women are twice as likely as  
69 young men of the same age to have HIV; [3] are frequently unaware of their HIV status and lack access  
70 to antiretroviral therapy (ART) and care. [4] They are more likely to experience physical or sexual  
71 violence from intimate partners compared to their male counterparts. [5,6] The lifetime prevalence of  
72 intimate partner violence among young women is 16%. [6,7] The violence experienced by young  
73 women is a significant factor in causing unequal infection rates in settings with high HIV prevalence.  
74 [8] Such disproportionately high rates of HIV infection in young women compared to young men are  
75 illuminated by an array of influences. For instance, social and institutional norms (e.g., male  
76 superiority) and gender-based power inequalities (e.g., sexual entitlement within relationships) prevent  
77 women from negotiating safe sex practices, which frequently impact their access to sexual and  
78 reproductive health care and HIV prevention services. [9–12]

79

80 Voluntary counselling and testing (VCT) for HIV is a gateway to HIV treatment and care for those who  
81 test positive and a prevention strategy for those who test negative. [13] Awareness of one's HIV

82 serostatus is associated with risk reduction and behaviour change. [14,15] Newly diagnosed HIV  
83 individuals can be promptly connected to ART, care, and support services. Timely HIV diagnosis and  
84 treatment access are crucial for preventing transmission, as newly diagnosed individuals can  
85 immediately be linked to ART, care, and support services. [16]

86  
87 While access to HIV testing, treatment, and support services has been expanding globally, the response  
88 to HIV testing has remained inadequate, particularly among young women who are recognised for  
89 having poor health-seeking behaviours in highly prevalent settings. [17,18] Factors associated with low  
90 coverage or not testing for HIV are multifactorial and include the fear of HIV test results and stigma,  
91 the perceived low risk of contracting HIV, and the psychological burden of living with HIV. [17,19] In  
92 addition, knowledge and attitude towards HIV testing services, age, education, engagement in sexual  
93 relationships, and distance to access testing facilities are associated with low uptake of HIV testing  
94 among young people. [20,21]

95  
96 PNG is one of the most HIV-affected countries in the Western Pacific Region, with a high HIV  
97 prevalence projected at 0.9% in the general adult population. [22,23] In 2022, an estimated 72,000  
98 people were living with HIV in PNG. [24] In addition, women of childbearing age (15–49 years) in  
99 PNG represent a disproportionate population that requires adequate HIV prevention services, including  
100 sexual and reproductive health care. [25–27] In 2022, women accounted for about 67% (41,000) of  
101 HIV, with 3,600 new HIV infections in the country. [24] It has been reported that HIV prevalence  
102 among PNG women is attributed to multiple factors such as gender inequality, sociocultural norms,  
103 household poverty, and unsupported social and structural factors, including unequal access to sexual  
104 and reproductive health services, increasing women’s vulnerability to HIV infection. [28–31]

105  
106 To address the burden of HIV, the government of PNG has integrated the WHO-recommended VCT  
107 for HIV into the country’s critical HIV prevention and control strategies. [32] With more ART  
108 programmes available, efforts to strengthen HIV testing have become increasingly important for early  
109 diagnosis and linking access to treatment, adherence to treatment, and viral load suppression. [32,33]  
110 Despite the country’s efforts to reduce HIV transmission, VCT uptake, linkage to ART, and support  
111 services remain problematic. [33–35] In particular, young women’s awareness of HIV prevention  
112 strategies, such as consistent condom use and reducing the number of sexual partners, remains low  
113 (24%). [2] For this study, young adult women aged 15–29 years were included in the analysis. Previous

114 studies have investigated sexual, social, and structural determinants of risk behaviours and adverse  
115 health outcomes, including HIV acquisition, among this group (aged 15–29). [36–38] However,  
116 research on factors associated with not testing is limited, especially in young women, who face a high  
117 risk of HIV. Furthermore, there have been no studies investigating how these factors influence HIV  
118 testing, an integral component of an HIV prevention package. Therefore, this study aimed to examine  
119 factors associated with not testing for HIV among young adult women in PNG. Recognising and  
120 addressing the challenges that young women face in accessing HIV testing services is critical to  
121 achieving the ambitious UNAIDS 95-95-95 targets to end the HIV/AIDS epidemic. [39]

122

## 123 **Methods**

### 124 **Study design and sampling**

125 This study is a result of the analysis of the 2016–2018 PNGDHS data, which is a nationally  
126 representative cross-sectional survey that provides data to monitor and evaluate population, health, and  
127 nutrition programmes. The PNGDHS researchers used a two-stage stratified sampling technique to  
128 recruit participants for the study. The first stage involved selecting 800 census units (CUs), which was  
129 achieved through a probability proportional to CU size. The second stage involved the systematic  
130 selection of 24 households from each cluster (CU) through equal probability sampling, with the  
131 resulting sample consisting of 19,200 households. The survey used the CUs from the 2011 PNG  
132 National Population and Housing Census, which used structured sampling. Additionally, PNG has 22  
133 administrative provinces, and each province is subdivided into urban and rural areas. Each province  
134 also has districts, and each district is divided into local-level government wards, where each ward is  
135 comprised of several CUs. The PNG National Statistical Office (NSO) and ICF International collected  
136 the data. In the interviewed households, 18,175 women aged 15–49 years were identified for individual  
137 interviews. Of these, 15,198 women participated in the survey successfully, yielding a response rate of  
138 84%. Among those who were interviewed successfully, 5,164 (the weighted sub-sample) were young  
139 adult women aged 15–29 years who had already initiated sex and were included in this study.  
140 Information about the methodology, pretesting, and training of field officers, the sampling design, and  
141 sample selection is available in the PNGDHS final report [40] and online at  
142 <https://dhsprogram.com/methodology/survey/survey-display-499.cfm>.

143

144

145

146

147 **Definition of variables**

148 ***Outcome variable***

149 The outcome variable was HIV testing among young adult women, a dichotomous variable coded as  
150 “1” when a woman reported having “ever been tested for HIV” and “0” when she reported otherwise  
151 (never tested for HIV). The information about the dependent variable was generated from this question.

152

153 ***Explanatory variables***

154 The explanatory variables used in this study were selected based on the available data in the 2016–2018  
155 PNGDHS datasets and previously published literature. [17,18,41] The independent variables were  
156 categorised into socio-demographic factors (age, marital status, education level, occupation, wealth  
157 index, place of residence, and region). Age was categorised into “15–19,” “20–24,” and “25–29.”  
158 Marital status was recoded into “never married,” “married/living with a partner,” and “previously  
159 married.” The occupation was recoded into “not working” and “working.” The wealth indices were  
160 determined by household assets owned (e.g., televisions and radio), housing construction materials, and  
161 access to water and sanitation facilities [40], and were reported as being “poorer,” “poor,” “middle,”  
162 “rich,” and “richer.” A new variable for the wealth index was created and recoded into “poor,”  
163 “middle,” and “rich.” Behaviour-related variables comprised the frequency of exposure to mass media  
164 (reading a newspaper or magazine, listening to the radio, and watching television), mobile phone  
165 ownership, and internet use. Exposure to media was determined by the frequency of reading a  
166 newspaper or magazine, listening to the radio, and watching television. Each of these variables had  
167 three responses: “not at all,” “less than once a week,” and “at least once a week.” These variables were  
168 recoded as “yes” and “no” responses to exposure to media. Use of the internet was identified as  
169 “never,” “yes, last 12 months,” “yes, before last 12 months,” and “yes, cannot establish.” The internet  
170 use variable was recoded into “no” and “yes.” Furthermore, health risk behaviours include age at first  
171 sex, the total number of sexual partners (in the last 12 months), ever being paid for sex (in exchange for  
172 cash, gifts, or others), always using a condom during sex, and history of any STI (in the last 12  
173 months). Age at sexual debut was recoded as “less than 20 years” and “20 years or older.” The total  
174 number of sexual partners (in the last 12 months) was recoded into “1” and “2 or more.” Incomplete  
175 and missing data in the “ever tested for HIV” group remained low (1.2%); therefore, they were  
176 excluded from the final analysis.

177

## 178 **Statistical analysis**

179 The final sample data was weighted to restore representativeness and produce a reliable estimate and  
180 standard error. Descriptive statistics were used to describe the sociodemographic and HIV-related  
181 characteristics of the participants. Bivariate analysis using the Pearson Chi-square ( $\chi^2$ ) test of  
182 independence was performed to examine the relationship between the explanatory variables and the  
183 outcome variable. Variables significant at  $p < 0.25$  in univariate analysis were then used in the final  
184 multivariable logistic regression model. [42] A Complex Sample Analysis Procedure that accounted for  
185 the cluster sampling design and sample weight to provide generalisable and accurate estimates of  
186 proportion, probability values, and odds ratios was employed in this analysis. [43,44] The Hosmer-  
187 Lemeshow goodness-of-fit was used to test for model fitness. Measures of association were presented  
188 as adjusted odds ratios (AORs) with their corresponding 95% confidence intervals (CIs). A  $p$ -value  $\leq$   
189 0.05 was used to determine the statistical significance of all analyses. All analyses were conducted  
190 using the IBM Statistical Package for the Social Sciences (SPSS), Version 26 (Armonk, NY: IBM  
191 Corp.).

192

## 193 **Patient and public involvement**

194 Patients and the public were not involved in the study. We analysed the secondary data available in the  
195 public repository.

196

## 197 **Results**

### 198 **Characteristics of participants**

199 Participants' demographic characteristics between those who were tested for HIV and those who were  
200 not are presented in **Table 1**. Of the total weighted sample of 5,164 young adult women, 3,010 [58.8%  
201 (95% CI 57.4%, 60.1%)] were never tested for HIV. The mean age was 21.65 (SD  $\pm$  4.23) years. Over  
202 half of the women who were not tested for HIV were young (aged  $< 20$  years) (55.1%), never married  
203 (79.4%), lacked formal education (63%), not working (60.2%), poor (71.2%), and from rural areas  
204 (62.9%). Nearly two-thirds were not exposed to the media (i.e., newspaper or magazine, radio,  
205 television). In terms of risky sexual behaviours and related factors, most women who had not tested for  
206 HIV reported a sexual debut at age  $< 20$  (61.3%), having one sexual partner (61.7%), having ever been  
207 paid for sex (64.9%), always using a condom during sex (51.1%), and not having had an STI in the last  
208 12 months (59.3%). There were statistically significant differences in the proportions of participants  
209 who had never been tested for HIV compared to those who had in all the demographic variables, age at

210 sexual debut, the total number of sexual partners, ever being for sex, and having had an STI for the past  
 211 12 months in the HIV-related variables ( $p < 0.05$ ).

212

**Table 1. Comparison of participants' demographic characteristics between those who were ever tested for HIV and those who were not in PNG.**

| Characteristics                            | Participants<br>5,164 (%) | Ever tested for HIV |                  | <i>p</i> -value*  |
|--------------------------------------------|---------------------------|---------------------|------------------|-------------------|
|                                            |                           | No<br>3,010 (%)     | Yes<br>2,154 (%) |                   |
| <b>Age group (years)</b>                   |                           |                     |                  | <b>0.001</b>      |
| 15–19                                      | 1,880                     | 1,035 (55.1)        | 845 (44.9)       |                   |
| 20–24                                      | 1,725                     | 1,028 (59.6)        | 697 (40.4)       |                   |
| 25–29                                      | 1,559                     | 947 (60.7)          | 612 (39.3)       |                   |
| Mean age = 21.65 (SD ± 4.23)               |                           |                     |                  |                   |
| <b>Marital status</b>                      |                           |                     |                  | <b>&lt; 0.001</b> |
| Never married                              | 832                       | 661 (79.4)          | 171 (20.6)       |                   |
| Married                                    | 4,005                     | 2,182 (54.5)        | 1,823 (45.5)     |                   |
| Divorced/separated                         | 327                       | 167 (51.1)          | 160 (48.9)       |                   |
| <b>Education<sup>#</sup></b>               |                           |                     |                  | <b>0.001</b>      |
| No formal education                        | 894                       | 563 (63.0)          | 331 (37.0)       |                   |
| Primary                                    | 2,652                     | 1,535 (57.9)        | 1,117 (42.1)     |                   |
| High/Secondary                             | 1,422                     | 785 (55.2)          | 637 (44.8)       |                   |
| College/Tertiary                           | 195                       | 127 (65.1)          | 68 (34.9)        |                   |
| <b>Occupation*</b>                         |                           |                     |                  | <b>&lt; 0.001</b> |
| Not working                                | 3,475                     | 2,091 (60.2)        | 1,384 (39.8)     |                   |
| Working                                    | 1,620                     | 883 (54.5)          | 737 (45.5)       |                   |
| <b>Wealth Index<sup>#</sup></b>            |                           |                     |                  | <b>&lt; 0.001</b> |
| Poor                                       | 1,977                     | 1,407 (71.2)        | 570 (28.8)       |                   |
| Middle                                     | 943                       | 540 (57.3)          | 403 (42.7)       |                   |
| Rich                                       | 2,243                     | 1,063 (47.4)        | 1,180 (52.6)     |                   |
| <b>Place of residence</b>                  |                           |                     |                  | <b>&lt; 0.001</b> |
| Urban                                      | 1,054                     | 424 (40.2)          | 630 (59.8)       |                   |
| Rural                                      | 4,110                     | 2,586 (62.9)        | 1,524 (37.1)     |                   |
| <b>Region</b>                              |                           |                     |                  | <b>&lt; 0.001</b> |
| Southern                                   | 999                       | 617 (61.8)          | 382 (38.2)       |                   |
| Highlands                                  | 2,259                     | 1,168 (51.7)        | 1,091 (48.3)     |                   |
| Momase                                     | 1,272                     | 870 (68.4)          | 402 (31.6)       |                   |
| Islands                                    | 633                       | 355 (56.1)          | 278 (43.9)       |                   |
| <b>Read newspaper/magazine<sup>#</sup></b> |                           |                     |                  | <b>&lt; 0.001</b> |
| No                                         | 3,311                     | 2,160 (65.2)        | 1,151 (34.8)     |                   |



|                                                    |       |              |              |                   |
|----------------------------------------------------|-------|--------------|--------------|-------------------|
| Yes                                                | 1,834 | 835 (45.5)   | 999 (54.5)   |                   |
| <b>Listen to the radio<sup>#</sup></b>             |       |              |              | <b>&lt; 0.001</b> |
| No                                                 | 3,253 | 2,107 (64.8) | 1,146 (35.2) |                   |
| Yes                                                | 1,893 | 896 (47.3)   | 997 (52.7)   |                   |
| <b>Watch television<sup>#</sup></b>                |       |              |              | <b>&lt; 0.001</b> |
| No                                                 | 3,814 | 2,366 (62.0) | 1,448 (38.0) |                   |
| Yes                                                | 1,298 | 602 (46.4)   | 696 (53.6)   |                   |
| <b>Owns a mobile phone<sup>#</sup></b>             |       |              |              | <b>&lt;0.001</b>  |
| No                                                 | 3,352 | 2,135 (63.7) | 1,217 (36.3) |                   |
| Yes                                                | 1,800 | 867 (48.2)   | 933 (51.8)   |                   |
| <b>Use the internet<sup>#</sup></b>                |       |              |              | <b>&lt; 0.001</b> |
| No                                                 | 4,362 | 2,676 (61.3) | 1,686 (38.7) |                   |
| Yes                                                | 783   | 325 (41.5)   | 458 (58.5)   |                   |
| <b>Age of sexual debut (years)</b>                 |       |              |              | <b>&lt; 0.001</b> |
| < 20                                               | 3,710 | 2,275 (61.3) | 1,435 (38.7) |                   |
| 20 or more                                         | 1,454 | 735 (50.6)   | 719 (49.4)   |                   |
| Mean age = 14.86 (SD ± 8.80)                       |       |              |              |                   |
| <b>Total number of sexual partners<sup>#</sup></b> |       |              |              | <b>&lt; 0.001</b> |
| 1                                                  | 3,564 | 2,198 (61.7) | 1,366 (38.3) |                   |
| 2 or more                                          | 1,486 | 755 (50.8)   | 731 (49.2)   |                   |
| <b>Ever being paid for sex<sup>#</sup></b>         |       |              |              | <b>0.050</b>      |
| No                                                 | 476   | 375 (78.8)   | 101 (21.2)   |                   |
| Yes                                                | 37    | 24 (64.9)    | 13 (35.1)    |                   |
| <b>Always condom use<sup>#</sup></b>               |       |              |              | 0.261             |
| No                                                 | 1,542 | 761 (49.4)   | 781 (50.6)   |                   |
| Yes                                                | 2,771 | 1,417 (51.1) | 1,354 (48.9) |                   |
| <b>Had any STI (last 12 months)<sup>#</sup></b>    |       |              |              | <b>&lt; 0.001</b> |
| No or don't know                                   | 4,859 | 2,882 (59.3) | 1,977 (40.7) |                   |
| Yes                                                | 221   | 85 (38.5)    | 136 (61.5)   |                   |

\* $\chi$  test,  $p = 0.05$ . <sup>#</sup>Variables with missing values.

213

## 214 Factors associated with not testing for HIV

215 Factors associated with not testing for HIV among young adult women are presented in **Table 2**. In the  
 216 multivariable logistic regression analysis, those who were never married (AOR: 4.9, 95% CI: 3.6–6.6),  
 217 had poor wealth index (AOR: 1.8, 95% CI: 1.3–2.5), from rural areas (AOR: 2.0, 95% CI: 1.5–2.6),  
 218 from the Momase region (AOR: 1.3, 95% CI: 1.0–1.7), did not read newspapers or magazines (AOR:

219 1.7, 95% CI: 1.3–2.1), did not listen to radio (AOR: 1.5, 95% CI: 1.1–2.0), experienced early sexual  
 220 debut (< 20 years) (AOR: 1.5, 95% CI: 1.1–1.9), had one sexual partner (AOR: 1.5, 95% CI: 1.2–2.0),  
 221 and reported no STI in the past 12 months (AOR: 1.8, 95% CI: 1.1–3.1) had higher odds of not testing  
 222 for HIV. Conversely, young women from the Highlands region had lower odds of not testing for HIV  
 223 compared with those in the Southern region (AOR: 0.4, 95% CI: 0.4–0.6).

224

**Table 2. Factors associated with not ever being tested for HIV in the multivariable logistic regression analysis.**

| Characteristics           | COR (95% CI)   | AOR (95% CI)  | <i>p</i> -value |
|---------------------------|----------------|---------------|-----------------|
| <b>Age group (years)</b>  |                |               | 0.133           |
| 15–19                     | Ref            | Ref           |                 |
| 20–24                     | 1.2 (0.9, 1.6) | 0.9 (0.8–1.2) |                 |
| 25–29                     | 1.3 (1.0, 1.6) | 1.2 (0.9–1.5) |                 |
| <b>Marital status</b>     |                |               | < 0.001         |
| Married                   | Ref            | Ref           |                 |
| Never married             | 3.2 (2.4, 4.3) | 4.9 (3.6–6.6) |                 |
| Divorced/separated        | 0.9 (0.6, 1.2) | 0.9 (0.7–1.4) |                 |
| <b>Education</b>          |                |               | 0.210           |
| No formal education       | 0.9 (0.3, 2.6) | 0.9 (0.3–2.7) |                 |
| Primary                   | 0.7 (0.3, 2.1) | 0.7 (0.3–2.0) |                 |
| High/Secondary            | 0.7 (0.2, 2.0) | 0.6 (0.2–2.0) |                 |
| College/Tertiary          | Ref            | Ref           |                 |
| <b>Occupation</b>         |                |               | 0.702           |
| Not working               | 1.3 (1.0, 1.5) | 1.0 (0.9–1.3) |                 |
| Working                   | Ref            | Ref           |                 |
| <b>Wealth Index</b>       |                |               | < 0.001         |
| Poor                      | 2.7 (2.2, 3.5) | 1.8 (1.3–2.5) |                 |
| Middle                    | 1.5 (1.1, 1.9) | 1.2 (0.9–1.7) |                 |
| Rich                      | Ref            | Ref           |                 |
| <b>Place of residence</b> |                |               | < 0.001         |
| Urban                     | Ref            | Ref           |                 |
| Rural                     | 2.5 (2.0, 3.1) | 2.0 (1.5–2.6) |                 |
| <b>Region</b>             |                |               | < 0.001         |
| Southern                  | Ref            | Ref           |                 |
| Highlands                 | 0.7 (0.5, 0.9) | 0.4 (0.4–0.6) |                 |

|                                        |                |               |                   |
|----------------------------------------|----------------|---------------|-------------------|
| Momase Islands                         | 1.3 (0.9, 1.9) | 1.3 (1.0–1.7) |                   |
|                                        | 0.8 (0.6, 1.0) | 1.0 (0.7–1.3) |                   |
| <b>Read newspaper/magazine</b>         |                |               | <b>&lt; 0.001</b> |
| No                                     | 2.2 (1.9, 2.7) | 1.7 (1.3–2.1) |                   |
| Yes                                    | Ref            | Ref           |                   |
| <b>Listen to radio</b>                 |                |               | <b>0.004</b>      |
| No                                     | 2.1 (1.7, 2.4) | 1.5 (1.1–2.0) |                   |
| Yes                                    | Ref            | Ref           |                   |
| <b>Watch television</b>                |                |               | 0.120             |
| No                                     | 1.9 (1.5, 2.3) | 0.8 (0.6–1.1) |                   |
| Yes                                    | Ref            | Ref           |                   |
| <b>Owns a mobile phone</b>             |                |               | 0.118             |
| No                                     | 1.9 (1.5, 2.3) | 1.2 (0.9–1.6) |                   |
| Yes                                    | Ref            | Ref           |                   |
| <b>Use the internet</b>                |                |               | 0.328             |
| No                                     | 2.2 (1.8, 2.8) | 1.1 (0.9–1.5) |                   |
| Yes                                    | Ref            | Ref           |                   |
| <b>Age of sexual debut (years)</b>     |                |               | <b>0.006</b>      |
| < 20                                   | 1.6 (1.2, 2.0) | 1.5 (1.1–1.9) |                   |
| 20 or older                            | Ref            | Ref           |                   |
| <b>Total number of sexual partners</b> |                |               | <b>0.001</b>      |
| 1                                      | 1.6 (1.2, 1.9) | 1.5 (1.2–2.0) |                   |
| 2 or more                              | Ref            | Ref           |                   |
| <b>Had any STI (last 12 months)</b>    |                |               | <b>0.024</b>      |
| No or don't know                       | 2.3 (1.5, 3.6) | 1.8 (1.1–3.1) |                   |
| Yes                                    | Ref            | Ref           |                   |

---

Ref = Reference Category; COR = Crude Odds Ratio; AOR = Adjusted Odds Ratio; CI = Confidence Interval; *p*-value = 0.05

225

## 226 Discussion

227 This study investigated factors associated with not testing for HIV among young adult women aged  
 228 15–29, based on a nationally representative sample. In our analysis of 5,164 young women from the  
 229 2016–2018 DHS in PNG, we found that 71% had never tested for HIV. Not testing for HIV was  
 230 associated with marital status, wealth index, place of residence, region, reading of newspapers and  
 231 magazines, listening to the radio, age of sexual debut, the total number of sexual partners, and having

232 any STI in the last 12 months preceding the survey, which were significantly associated with not  
233 testing for HIV among young adult women. Given the nature of the study, a causal association cannot  
234 be established. Also, behavioural desirability bias might have some effect on the underreporting of  
235 sexual behaviours since all the responses were self-reported.

236  
237 Seven out of every 10 young adult women were never tested for HIV, suggesting a significantly low  
238 proportion of HIV testing. This finding corresponds with previous studies from sub-Saharan Africa  
239 (63.5%) [41], including Ethiopia (66.5%) and Nigeria (76.3%), [17,18] which showed significantly low  
240 HIV testing rates among young women. The low HIV testing uptake in the country may be due to  
241 differences in HIV testing modalities implemented for young women. Strategies to optimise access to  
242 HIV testing need to shift from conventional facility-based testing to community- and home-based  
243 testing services. Community and home-based HIV testing have been proven to enhance HIV testing  
244 coverage among young women through self-testing and linking them to ART treatment. [45–47] Self-  
245 testing for HIV could increase the proportion of individuals who have ever tested, increase testing  
246 frequency, and promote early detection and treatment. [48]

247  
248 In this study, the majority (80%) of women were from poor households and reported to have never  
249 been tested for HIV. This finding supports the recent studies showing that young women, particularly  
250 in low- and middle-income countries, encounter a heterogeneous risk for HIV based on their household  
251 socioeconomic conditions. [49,50] Furthermore, various aspects of socio-cultural structure can  
252 potentiate the HIV risk burden for poor women, such as lack of access to information, health care,  
253 formal education, economic opportunities, and exposure to violence. [49]

254  
255 Adolescent girls and young women from economically disadvantaged and poor households are at  
256 higher risk for HIV due to their lack of awareness about HIV transmission and their less frequent use of  
257 condoms. [49] However, the authors of studies conducted in Malawi and Rwanda found an inverse  
258 association between rich households, higher education, and the uptake of HIV testing among young  
259 women. [51,52] While earlier studies in PNG have suggested strategies for reducing the gap between  
260 socioeconomic quintiles and health among young women, [29] there is still evidence of inequalities.  
261 Studies have shown links between HIV testing and better adherence to safe sex practices and women's  
262 empowerment in terms of education, financial independence, control over household financial  
263 decisions, and the power of negotiating sex. [53–55] Our findings suggest that there is an urgent need

264 to tailor prevention strategies for HIV for this group that are sensitive to their culture and  
265 socioeconomic context. The focus on improving access to HIV testing services should first be on  
266 conceptualising gender in a way that is inclusive. Furthermore, there is a need to address barriers  
267 related to poor care-seeking behaviours through the provision of youth-friendly services.

268  
269 Additionally, the findings of this study showed that rural women are twice as likely not to be tested for  
270 HIV compared to their urban counterparts, which corresponds with recent studies conducted in  
271 Ethiopia [18] and eastern Africa. [56] Low uptake of HIV testing could be due to the difficulty in  
272 accessing sexual and reproductive health and HIV services in primary healthcare facilities, including  
273 gender issues, societal norms, and a lack of HIV knowledge, as reported in other studies. [27,57,58]  
274 Contrary to the findings of our study, the authors of the Ethiopian study have reported an increased  
275 uptake of HIV testing among women in rural areas who have higher socio-economic status, non-  
276 farming occupations, female-headed households, live within proximity of health facilities, and  
277 participate in community dialogues. [59] The utilisation of HIV testing services in rural areas is largely  
278 influenced by socio-economic, behavioural, and health service factors.

279  
280 Our study further found a negative association between the region of residence and not testing for HIV,  
281 with women in the Momase region being more likely to not be tested for HIV compared to those in the  
282 Southern region. The regional disparities in not testing for HIV in PNG could be a result of the unequal  
283 allocation and distribution of health resources, including access to healthcare services [26,31]. This  
284 finding highlights the need for interventions aimed at improving HIV testing, especially targeting  
285 women from disadvantaged regions of the country.

286  
287 Women who had no access to at least one media platform (newspapers or radio) were less likely to  
288 have been tested for HIV. This confirms the findings from recent Ethiopian studies that a lack of media  
289 access and comprehensive HIV knowledge is associated with lower odds of HIV testing. [60,61] It is  
290 most likely that young women do not read newspapers or listen to the radio. However, a recent  
291 Rwandan study revealed that young women who have access to at least one media platform at least  
292 once a week (newspapers, TV, or radio) are more likely to have been tested for HIV. [52] Media  
293 exposure increases awareness about the importance of HIV testing and improves understanding of the  
294 prevention approach, which might encourage women to be tested for HIV. [60] The results of the study

295 underscore the need to utilise various media platforms in disseminating HIV information to sensitise  
296 young women to constantly learn about the benefits of HIV prevention.

297

298 Findings from this study showed that the majority (61.3%) of women who debuted sex were aged < 20  
299 and were not tested for HIV compared to their counterparts. The study supports previous findings  
300 suggesting a low HIV testing prevalence among this age group in high-prevalence settings. [17] Early  
301 sexual debut with risky behaviours has been posited as an important risk factor for HIV infection.  
302 Studies have shown that factors such as peer pressure, lower education, coercion, substance use  
303 (tobacco and alcohol use), poor parental or guardian attachment, and exposure to pornographic  
304 materials were associated with an early sexual debut. [62–64] Furthermore, a lack of HIV knowledge  
305 and low-risk perception have been considered a potential barrier to HIV testing among adolescent  
306 women. [65] This could be a likely reason why young women were not tested for HIV in this study.  
307 The precocious sexual debut predisposes young women to adverse psychological and health outcomes.  
308 Thus, the need for timely, age-appropriate, continuous, and enhanced awareness and reproductive  
309 health services and interventions is imperative for this priority group.

310

311 Regarding the number of sexual partners, women who had one sexual partner had lower odds of being  
312 tested for HIV compared with their counterparts. This finding is in contrast with other studies [56],  
313 where women with multiple sex partners had a lower chance of being tested for HIV. The low uptake  
314 of HIV testing among young women in this study could be due to the perception that they have a lower  
315 risk of contracting HIV because they have one sexual partner. Another reason could be that women  
316 refuse or forgo testing out of fear of the consequences they may encounter, such as HIV-related stigma  
317 and discrimination, including violence from their partners and family for disclosing their HIV-positive  
318 status, as reported in previous studies. [27,66,67] There are common notions that female biological  
319 vulnerability makes women more likely to contract HIV than men and that women's socio-economic  
320 marginalisation increases their HIV risk. [57] HIV-related stigma can manifest in a variety of ways,  
321 including isolation, mockery, condemnation, physical and verbal abuse, and denial of healthcare  
322 access, including HIV services. [68] Interventions to address stigma should not be confined to health  
323 facilities; instead, they need to be tailored and focus on creating changes in individual knowledge,  
324 attitudes, and behaviours rather than broader social and environmental changes.

325

326 In this study, participants who had no STIs in the last 12 months were likely not to have ever been  
327 tested for HIV, indicating a lack of awareness and knowledge about STIs. Studies have shown that  
328 understanding of STIs in terms of acquisition, protection, prevention, and clinical signs and symptoms  
329 is limited among young people. [69] Poor knowledge about STI screening and services could be one  
330 possible explanation for young women not knowing their STI statuses. Lack of STI information and  
331 screening services, acceptability of services, fear of positive test results, fear of invasive procedures,  
332 self-consciousness of genital examination, anticipated stigma, and confidentiality concerns have been  
333 found to impede STI screening uptake among young people. [70–72] Also, young women may not  
334 have access to the required STI information and services to avoid infections or may be hesitant to  
335 access the facilities where information is available. This could be another reason for being unsure or  
336 not having any STIs. This study highlights the unmet need for STI screening among young adult  
337 women in PNG. Urgent efforts are needed to improve STI knowledge through tailored sexual and  
338 reproductive health services while taking into account social and cultural norms surrounding gender  
339 and sexuality.

340

#### 341 **Implications for practice and research**

342 Increasing uptake of HIV testing and counselling among young women can lead to earlier diagnosis,  
343 linkage to ART, and retention in care. Interventions that are affordable, feasible, and acceptable for this  
344 population to increase access to and the likelihood of being tested remain imperative. To optimise  
345 testing coverage, it is necessary to determine young women's preferences about HIV testing modalities  
346 and where they choose to access the service. HIV testing options for young women that include self-  
347 testing are promising strategies that may overcome an array of access barriers in this context. In  
348 addition, sexual and reproductive health for young women remains crucial to increasing the uptake of  
349 HIV testing. There is a need for more sensitisation programmes for healthcare providers, for instance,  
350 education and training to sensitise them to reduce HIV-related fear and stigma among young women  
351 through user-friendly services. Given that the majority of young women do not seek HIV testing  
352 services in PNG, there is a critical need for implementation research on strategies for increasing access  
353 to testing, prevention, and treatment. While the findings of this study have provided information about  
354 the proportion of young women who have never tested for HIV, it is also important to have an in-depth  
355 understanding of the barriers to HIV testing in this age group. Further qualitative research is required to  
356 explore barriers and facilitators to HIV testing among this population, which could inform the  
357 development of novel HIV prevention strategies.

## 358 **Conclusions**

359 HIV testing among young adult women remained low in PNG, with more than half having not been  
360 tested for HIV. Factors associated with not testing for HIV included never being married, poor  
361 households, rural areas, not having access to media (newspaper, magazine, or radio), early sexual  
362 debut, having one sex partner, and an unknown STI status. These factors could allow the epidemic to  
363 intensify as young adult women with undiagnosed infections are not likely to be tested for HIV, adopt  
364 behaviour change and risk reduction strategies, or access treatment. The use of various media platforms  
365 is crucial for disseminating information on HIV/STI prevention, risk reduction, and increasing HIV  
366 testing uptake among young women. Efforts to optimise access to HIV testing should also shift from  
367 conventional facility-based testing to community- and home-based testing services to target those who  
368 are disadvantaged and from rural areas. Furthermore, programmatic approaches from the government,  
369 civil society, and communities to overcome barriers associated with the uptake of HIV testing are thus  
370 warranted.

371

## 372 **Acknowledgements**

373 We are grateful to the ICF International and DHS Program for permitting us to use the 2016–2018  
374 PNGDHS dataset to conduct this study.

375

## 376 **References**

- 377 [dataset] 1 UNAIDS. Global HIV & AIDS statistics - Fact sheet. Global HIV & AIDS statistics —  
378 Fact sheet. 2023. <https://www.unaids.org/en/resources/fact-sheet>
- 379 [dataset] 2 UNAIDS. UNAIDS Data 2021. Geneva, Switzerland: UNAIDS 2021.  
380 [https://www.unaids.org/en/resources/documents/2021/2021\\_unaids\\_data](https://www.unaids.org/en/resources/documents/2021/2021_unaids_data)
- 381 [dataset] 3 Karim SSA, Baxter C. HIV incidence rates in adolescent girls and young women in sub-  
382 Saharan Africa. *The Lancet Global Health*. 2019;7:e1470–1. doi: 10.1016/S2214-109X(19)30404-8
- 383 [dataset] 4 Stoner MCD, Nguyen N, Kilburn K, *et al*. Age-disparate partnerships and incident HIV  
384 infection in adolescent girls and young women in rural South Africa. *AIDS*. 2019;33:83–91. doi:  
385 10.1097/QAD.0000000000002037
- 386 [dataset] 5 De Veauuse Brown NF, Annor FB, Swahn MH, *et al*. Sexual Violence Experience  
387 Among Nigerian Girls and Young Women: What Are the Roles of Early Sexual Debut, Multiple  
388 Sex Partnerships, and Traditional Gender Role Beliefs? *J Interpers Violence*. 2022;37:NP2747–67.
- 389 [dataset] 6 Sardinha L, Maheu-Giroux M, Stöckl H, *et al*. Global, regional, and national prevalence  
390 estimates of physical or sexual, or both, intimate partner violence against women in 2018. *The*  
391 *Lancet*. 2022;399:803–13.



- 392 [dataset] 7 World Health Organization. *Violence against women prevalence estimates, 2018:*  
393 *global, regional and national prevalence estimates for intimate partner violence against women*  
394 *and global and regional prevalence estimates for non-partner sexual violence against women.*  
395 World Health Organization 2021.
- 396 [dataset] 8 Annor FB, Chiang LF, Oluoch PR, *et al.* Changes in prevalence of violence and risk  
397 factors for violence and HIV among children and young people in Kenya: a comparison of the 2010  
398 and 2019 Kenya Violence Against Children and Youth Surveys. *The Lancet Global Health.*  
399 2022;10:e124–33.
- 400 [dataset] 9 Brown R, Kismödi E, Khosla R, *et al.* A sexual and reproductive health and rights  
401 journey: from Cairo to the present. *Sexual and Reproductive Health Matters.* 2019;27:326–8. doi:  
402 10.1080/26410397.2019.1676543
- 403 [dataset] 10 Imo CK, Odimegwu CO, De Wet-Billings N. Women’s attitudes towards negotiating  
404 safe sexual practices in Nigeria: Do family structure and decision-making autonomy play a role?  
405 *BMC Women’s Health.* 2022;22:16.
- 406 [dataset] 11 Mabaso M, Sokhela Z, Mohlabane N, *et al.* Determinants of HIV infection among  
407 adolescent girls and young women aged 15-24 years in South Africa: a 2012 population-based  
408 national household survey. *BMC Public Health.* 2018;18:183–183. doi: 10.1186/s12889-018-5051-  
409 3
- 410 [dataset] 12 Seidu A-A, Aboagye RG, Okyere J, *et al.* Women’s autonomy in household decision-  
411 making and safer sex negotiation in sub-Saharan Africa: An analysis of data from 27 Demographic  
412 and Health Surveys. *SSM - Population Health.* 2021;14:100773.
- 413 [dataset] 13 World Health Organization. *Consolidated guidelines on HIV testing services, 2019.*  
414 Geneva, Switzerland: World Health Organization 2020.  
415 <https://apps.who.int/iris/bitstream/handle/10665/336323/9789241550581-eng.pdf>
- 416 [dataset] 14 Ryan S, Hahn E, Rao A, *et al.* The impact of HIV knowledge and attitudes on HIV  
417 testing acceptance among patients in an emergency department in the Eastern Cape, South Africa.  
418 *BMC Public Health.* 2020;20:1066.
- 419 [dataset] 15 Scott-Sheldon LA, Carey MP, Carey KB, *et al.* HIV testing is associated with increased  
420 knowledge and reductions in sexual risk behaviours among men in Cape Town, South Africa. *null.*  
421 2013;12:195–201.
- 422 [dataset] 16 Sanga ES, Lerebo W, Mushi AK, *et al.* Linkage into care among newly diagnosed HIV-  
423 positive individuals tested through outreach and facility-based HIV testing models in Mbeya,  
424 Tanzania: a prospective mixed-method cohort study. *BMJ Open.* 2017;7:e013733.
- 425 [dataset] 17 Ajayi AI, Awopegba OE, Adeagbo OA, *et al.* Low coverage of HIV testing among  
426 adolescents and young adults in Nigeria: Implication for achieving the UNAIDS first 95. *PLOS*  
427 *ONE.* 2020;15:e0233368. doi: <https://doi.org/10.1371/journal.pone.0233368>
- 428 [dataset] 18 Bekele YA, Fekadu GA. Factors associated with HIV testing among young females;  
429 further analysis of the 2016 Ethiopian demographic and health survey data. *PLOS ONE.*  
430 2020;15:e0228783. doi: 10.1371/journal.pone.0228783
- 431 [dataset] 19 MacCarthy S, Saya U, Samba C, *et al.* “How am I going to live?”: exploring barriers to  
432 ART adherence among adolescents and young adults living with HIV in Uganda. *BMC Public*  
433 *Health.* 2018;18:1158. doi: 10.1186/s12889-018-6048-7

- 434 [dataset] 20 MacKellar DA, Hou S-I, Whalen CC, *et al.* Reasons for Not HIV Testing, Testing  
435 Intentions, and Potential Use of an Over-the-Counter Rapid HIV Test in an Internet Sample of Men  
436 Who Have Sex With Men Who Have Never Tested for HIV. *Sexually Transmitted Diseases*.  
437 2011;38.
- 438 [dataset] 21 Sanga Z, Kapanda G, Msuya S, *et al.* Factors influencing the uptake of Voluntary HIV  
439 Counseling and Testing among secondary school students in Arusha City, Tanzania: a cross  
440 sectional study. *BMC Public Health*. 2015;15:452.
- 441 [dataset] 22 Grundy J, Dakulala P, Wai K, *et al.* Independent State of Papua New Guinea Health  
442 System Review. World Health Organization. Regional Office for South-East Asia 2019.
- 443 [dataset] 23 World Health Organization. HIV data and statistics in the Western Pacific: HIV in the  
444 Region. 2022. <https://www.who.int/westernpacific/health-topics/hiv-aids/regional-data>
- 445 [dataset] 24 UNAIDS. Country Factsheet: HIV and AIDS Estimates 2022. Country: Papua New  
446 Guinea. 2023. <https://www.unaids.org/en/regionscountries/countries/papuanewguinea> (accessed 26  
447 May 2023)
- 448 [dataset] 25 Gray N, Azzopardi P, Kennedy E, *et al.* Improving Adolescent Reproductive Health in  
449 Asia and the Pacific: Do We Have the Data? A Review of DHS and MICS Surveys in Nine  
450 Countries. *Asia Pac J Public Health*. 2013;25:134–44. doi: 10.1177/1010539511417423
- 451 [dataset] 26 Robin Klaver, Jennifer Ruth Coe. Barriers to healthcare for female patients in Papua  
452 New Guinea. *BMJ Case Reports*. 2018;2018:bcr-2017-224005.
- 453 [dataset] 27 Redman-MacLaren ML, Mills J, Tommbe R, *et al.* Women and HIV in a moderate  
454 prevalence setting: an integrative review. *BMC Public Health*. 2013;13:552. doi: 10.1186/1471-  
455 2458-13-552
- 456 [dataset] 28 Eves R. Marital sexual violence and conjugality in highlands Papua New Guinea.  
457 *Culture, Health & Sexuality*. 2020;1–15.
- 458 [dataset] 29 Hinton R, Earnest J. The right to health: Overcoming inequalities and barriers to  
459 women’s health in Papua New Guinea. *Women’s Studies International Forum*. 2010;33:180–7.
- 460 [dataset] 30 Shih P, Worth H, Travaglia J, *et al.* ‘Good culture, bad culture’: polygyny, cultural  
461 change and structural drivers of HIV in Papua New Guinea. *Culture, Health & Sexuality*.  
462 2017;19:1024–37. doi: 10.1080/13691058.2017.1287957
- 463 [dataset] 31 Kassens AL, van der Meulen Rodgers Y. Health and Distance to Healthcare in Papua  
464 New Guinea. In: Batabyal AA, Higan Y, Nijkamp P, eds. *Disease, Human Health, and Regional  
465 Growth and Development in Asia*. Singapore: Springer Singapore 2019:203–29.  
466 [https://doi.org/10.1007/978-981-13-6268-2\\_10](https://doi.org/10.1007/978-981-13-6268-2_10)
- 467 [dataset] 32 National AIDS Council Secretariat (NACS). PNG National STI and HIV Strategy 2018-  
468 2022. 2018.
- 469 [dataset] 33 Gare J, Kelly-Hanku A, Ryan CE, *et al.* Factors Influencing Antiretroviral Adherence  
470 and Virological Outcomes in People Living with HIV in the Highlands of Papua New Guinea.  
471 *PLoS One*. 2015;10:e0134918–e0134918. doi: 10.1371/journal.pone.0134918
- 472 [dataset] 34 Kelly A, Worth H, Man N, *et al.* Barriers and Facilitators for Adherence to  
473 Antiretroviral Therapy in Papua New Guinea. *Current HIV Research*. 2010;8:630–7. doi:  
474 10.2174/157016210794088191

- 475 [dataset] 35 Mitchell E, Hakim A, Nosi S, *et al.* A socio-ecological analysis of factors influencing  
476 HIV treatment initiation and adherence among key populations in Papua New Guinea. *BMC Public*  
477 *Health*. 2021;21:2003.
- 478 [dataset] 36 Romero-Estudillo E, González-Jiménez E, Mesa-Franco MC, *et al.* Gender-based  
479 differences in the high-risk sexual behaviours of young people aged 15-29 in Melilla (Spain): a  
480 cross-sectional study. *BMC Public Health*. 2014;14:745.
- 481 [dataset] 37 Marianne Johansson Jørgensen, Helle Terkildsen Maindal, Kaj Sparle Christensen, *et al.*  
482 Sexual behaviour among young Danes aged 15–29 years: a cross-sectional study of core indicators.  
483 *Sex Transm Infect*. 2015;91:171.
- 484 [dataset] 38 Raiford JL, Herbst JH, Carry M, *et al.* Low Prospects and High Risk: Structural  
485 Determinants of Health Associated with Sexual Risk Among Young African American Women  
486 Residing in Resource-Poor Communities in the South. *American Journal of Community*  
487 *Psychology*. 2014;54:243–50.
- 488 [dataset] 39 Frescura L, Godfrey-Faussett P, Feizzadeh A. A, *et al.* Achieving the 95 95 95 targets  
489 for all: A pathway to ending AIDS. *PLOS ONE*. 2022;17:e0272405.
- 490 [dataset] 40 National Statistics Office (NSO) [PNG], ICF. Papua New Guinea Demographic and  
491 Health Survey 2016-18. Port Moresby, Papua New Guinea & Rockville, Maryland, USA: NSO and  
492 ICF 2019. <https://dhsprogram.com/methodology/survey/survey-display-499.cfm>
- 493 [dataset] 41 Asaolu IO, Gunn JK, Center KE, *et al.* Predictors of HIV Testing among Youth in Sub-  
494 Saharan Africa: A Cross-Sectional Study. *PLOS ONE*. 2016;11:e0164052. doi:  
495 <https://doi.org/10.1371/journal.pone.0164052>
- 496 [dataset] 42 Zhang Z. Model building strategy for logistic regression: purposeful selection. *Annals of*  
497 *Translational Medicine; Vol 4, No 6 (March 25, 2016): Annals of Translational Medicine (Toward*  
498 *Precision Medicine in Neurological Diseases)*. Published Online First: 2016. doi:  
499 <http://dx.doi.org/10.21037/atm.2016.02.15>
- 500 [dataset] 43 Archer KJ, Lemeshow S, Hosmer DW. Goodness-of-fit tests for logistic regression  
501 models when data are collected using a complex sampling design. *Computational Statistics & Data*  
502 *Analysis*. 2007;51:4450–64.
- 503 [dataset] 44 West BT. Statistical and methodological issues in the analysis of complex sample  
504 survey data: Practical guidance for trauma researchers. *Journal of Traumatic Stress*. 2008;21:440–  
505 7.
- 506 [dataset] 45 Sibanda EL, Neuman M, Tumushime M, *et al.* Community-based HIV self-testing: a  
507 cluster-randomised trial of supply-side financial incentives and time-trend analysis of linkage to  
508 antiretroviral therapy in Zimbabwe. *BMJ Glob Health*. 2021;6:e003866.
- 509 [dataset] 46 Kyaddondo D, Wanyenze RK, Kinsman J, *et al.* Home-based HIV counseling and  
510 testing: Client experiences and perceptions in Eastern Uganda. *BMC Public Health*. 2012;12:966.
- 511 [dataset] 47 Sekandi JN, Sempeera H, List J, *et al.* High acceptance of home-based HIV counseling  
512 and testing in an urban community setting in Uganda. *BMC Public Health*. 2011;11:730.
- 513 [dataset] 48 Johnson CC, Kennedy C, Fonner V, *et al.* Examining the effects of HIV self-testing  
514 compared to standard HIV testing services: a systematic review and meta-analysis. *Journal of the*  
515 *International AIDS Society*. 2017;20:21594.

- 516 [dataset] 49 Gutiérrez JP, Trossero A. Socioeconomic inequalities in HIV knowledge, HIV testing,  
517 and condom use among adolescent and young women in Latin America and the Caribbean. *Rev*  
518 *Panam Salud Publica*. 2021;45:e47.
- 519 [dataset] 50 Mabaso M, Sokhela Z, Mohlabane N, *et al*. Determinants of HIV infection among  
520 adolescent girls and young women aged 15-24 years in South Africa: a 2012 population-based  
521 national household survey. *BMC Public Health*. 2018;18:183–183. doi: 10.1186/s12889-018-5051-  
522 3
- 523 [dataset] 51 Mandiwa C, Namondwe B, Munthali M. Prevalence and correlates of comprehensive  
524 HIV/AIDS knowledge among adolescent girls and young women aged 15–24 years in Malawi:  
525 evidence from the 2015–16 Malawi demographic and health survey. *BMC Public Health*.  
526 2021;21:1508.
- 527 [dataset] 52 Musekiwa A, Silinda P, Bamogo A, *et al*. Prevalence and factors associated with self-  
528 reported HIV testing among adolescent girls and young women in Rwanda: evidence from 2019/20  
529 Rwanda Demographic and Health Survey. *BMC Public Health*. 2022;22:1281.
- 530 [dataset] 53 Sherafat-Kazemzadeh R, Gaumer G, Hariharan D, *et al*. Between a Rock and a Hard  
531 Place: How poverty and lack of agency affect HIV risk behaviors among married women in 25  
532 African countries: A cross-sectional study. *J Glob Health*. 2021;11:04059.
- 533 [dataset] 54 Zegeye B, Adjei NK, Ahinkorah BO, *et al*. HIV testing among women of reproductive  
534 age in 28 sub-Saharan African countries: a multilevel modelling. *International Health*.  
535 2023;15:573–84.
- 536 [dataset] 55 Schierl T, Tanaka LF, Klug SJ, *et al*. The Association of Women’s Empowerment with  
537 HIV-Related Indicators: A Pooled Analysis of Demographic and Health Surveys in Sub-Saharan  
538 Africa. *Journal of Epidemiology and Global Health*. 2023;13:816–24.
- 539 [dataset] 56 Worku MG, Teshale AB, Tesema GA. Prevalence and associated factors of HIV testing  
540 among young (15–24) women in eastern Africa: a multilevel analysis of demographic health survey  
541 data (2008-2018). *Archives of Public Health*. 2022;80:117.
- 542 [dataset] 57 Eves R. Masculinity matters: Men, gender-based violence and the AIDS epidemic in  
543 Papua New Guinea. *Civic Insecurity: Law, Order and HIV in Papua New Guinea*. 2010;1:47–79.
- 544 [dataset] 58 McCall C. In Papua New Guinea, HIV/AIDS-related stigma is still rife. *The Lancet*.  
545 2016;387:215–6.
- 546 [dataset] 59 Teklehaimanot HD, Teklehaimanot A, Yohannes M, *et al*. Factors influencing the  
547 uptake of voluntary HIV counseling and testing in rural Ethiopia: a cross sectional study. *BMC*  
548 *Public Health*. 2016;16:239.
- 549 [dataset] 60 Diress G, Ahmed M, Adane S, *et al*. Barriers and Facilitators for HIV Testing Practice  
550 Among Ethiopian Women Aged 15-24 years: Analysis of the 2016 Ethiopian Demographic and  
551 Health Survey. *HIV/AIDS - Research and Palliative Care*. 2020;12:963–70.
- 552 [dataset] 61 Alem AZ, Liyew AM, Guadie HA. Spatial pattern and associated factors of HIV testing  
553 and counselling among youths (15–24 years) in Ethiopia. *BMC Public Health*. 2021;21:644.
- 554 [dataset] 62 Omona K, Ssuka JK. Early sexual debut and associated factors among adolescents in  
555 Kasawo Sub-county, Mukono district, Uganda. *Cogent Public Health*. 2023;10:2183561.
- 556 [dataset] 63 Ferede TA, Muluneh AG, Wagnew A, *et al*. Prevalence and associated factors of early  
557 sexual initiation among youth female in sub-Saharan Africa: a multilevel analysis of recent  
558 demographic and health surveys. *BMC Women’s Health*. 2023;23:147.

- 559 [dataset] 64 Millanzi WC, Osaki KM, Kibusi SM. Attitude and prevalence of early sexual debut and  
560 associated risk sexual behavior among adolescents in Tanzania; Evidence from baseline data in a  
561 Randomized Controlled Trial. *BMC Public Health*. 2023;23:1758.
- 562 [dataset] 65 Kamire V, Magut F, Khagayi S, *et al*. HIV Risk Factors and Risk Perception Among  
563 Adolescent Girls and Young Women: Results From a Population-Based Survey in Western Kenya,  
564 2018. *J Acquir Immune Defic Syndr*. 2022;91:17–25.
- 565 [dataset] 66 Colombini M, James C, Ndwiga C, *et al*. The risks of partner violence following HIV  
566 status disclosure, and health service responses: narratives of women attending reproductive health  
567 services in Kenya. *Journal of the International AIDS Society*. 2016;19:20766.
- 568 [dataset] 67 Mengwai K, Madiba S, Modjadji P. Low Disclosure Rates to Sexual Partners and  
569 Unsafe Sexual Practices of Youth Recently Diagnosed with HIV; Implications for HIV Prevention  
570 Interventions in South Africa. *Healthcare*. 2020;8. doi: 10.3390/healthcare8030253
- 571 [dataset] 68 Pulerwitz J, Michaelis A, Weiss E, *et al*. Reducing HIV-Related Stigma: Lessons  
572 Learned from Horizons Research and Programs. *Public Health Rep*. 2010;125:272–81.
- 573 [dataset] 69 Malli IA, Kabli BA, Alhakami LA. Sexually Transmitted Diseases among Saudi  
574 Women: Knowledge and Misconceptions. *International Journal of Environmental Research and  
575 Public Health*. 2023;20. doi: 10.3390/ijerph20064858
- 576 [dataset] 70 Avuvika E, Masese LN, Wanje G, *et al*. Barriers and Facilitators of Screening for  
577 Sexually Transmitted Infections in Adolescent Girls and Young Women in Mombasa, Kenya: A  
578 Qualitative Study. *PLoS One*. 2017;12:e0169388.
- 579 [dataset] 71 Denison HJ, Bromhead C, Grainger R, *et al*. Barriers to sexually transmitted infection  
580 testing in New Zealand: a qualitative study. *Australian and New Zealand Journal of Public Health*.  
581 2017;41:432–7.
- 582 [dataset] 72 Newton-Levinson A, Leichter JS, Chandra-Mouli V. Sexually Transmitted Infection  
583 Services for Adolescents and Youth in Low- and Middle-Income Countries: Perceived and  
584 Experienced Barriers to Accessing Care. *Journal of Adolescent Health*. 2016;59:7–16.

585

## 586 **Supplementary materials**

587 STROBE Checklist

588

## 589 **Footnotes**

590 **Contributors:** MKM conceptualized and designed the study. MKM and FWK conducted statistical  
591 analyses. MKM drafted the original manuscript. FWK contributed to the writing and editing of the  
592 manuscript. MKM and FWK reviewed and edited the manuscript. All the authors reviewed and  
593 approved the final version of the manuscript. MKM is the guarantor and accepts full responsibility for  
594 the work.

595

596 **Funding:** The authors have not declared a specific grant for this research from any funding agency in  
597 the public, commercial, or not-for-profit sectors.

598

599 **Competing interests:** None declared.

600

601 **Patient consent for publication:** Not required.

602

603 **Ethics approval:** The 2016–2018 PNGDHS protocol was reviewed and approved by the Institutional  
604 Review Board of ICF and Medical Research Advisory Committee of PNG. Informed consent was  
605 obtained from all participants before the interviews were conducted. For this study, a formal request to  
606 use the raw data was obtained from the DHS program. Permission was granted by the DHS program to  
607 access the data, which was anonymized for analysis.

608

609 **Provenance and peer review:** Not commissioned; externally peer reviewed.

610

611 **Data availability statement:** The 2016–2018 PNGDHS data are publicly available in a public, open-  
612 access repository. Data can be obtained upon a registration-access request from the DHS Program  
613 website at <https://dhsprogram.com/data/available-datasets.cfm>.
